# Supplementary material for: Phenolic Compounds Isolated from Caesalpinia coriaria Induce S and G2/M Phase Cell Cycle Arrest Differentially and Trigger Cell Death by Interfering with Microtubule Dynamics in Cancer Cell Lines
Source: PubMed Central journal article supplement (PMC6154320; doi:10.3390/molecules22040666), 2017-04-22
Supplement: molecules-22-00666-s001.pdf [file molecules-22-00666-s001.pdf]

Article

***Phenolic compounds isolated from *Caesalpinia coriaria* induce S and G2/M phase cell cycle arrest differentially and trigger cell death by interfering with microtubule dynamics in cancer cell lines***

**Jessica Nayelli Sánchez Carranza <sup>1</sup>, Laura Álvarez Berber <sup>2</sup>, Silvia Marquina Bahena <sup>2</sup>, Enrique Salas Vidal <sup>3</sup>, Verónica Cuevas <sup>1</sup>, Elizabeth W. Jimenez <sup>1</sup>, Rafael A. Veloz G. <sup>4</sup>, Maelle Carraz <sup>5</sup> and Leticia González-Maya <sup>1\*</sup>**

<sup>1</sup> Facultad de Farmacia, Universidad Autónoma del Estado de Morelos, Av. Universidad 1001, Col. Chamilpa, Cuernavaca, México; jes\_chazaq@hotmail.com (J.N.S.); vero\_7cd89@hotmail.com (V.C.); sumasr@hotmail.com (E.W.J.); letymaya@uaem.mx (L.G.M.)

<sup>2</sup> Centro de Investigaciones Químicas-IICBA, Universidad Autónoma del Estado de Morelos, Av. Universidad 1001, Col. Chamilpa, Cuernavaca, México; lalvarez@uaem.mx (L.A.B.); smarquina@uaem.mx (S.M.B)

<sup>3</sup> Departamento de Genética del Desarrollo y Fisiología Molecular de Biotecnología, Universidad Nacional Autónoma de México, Cuernavaca Morelos, México; esalas@ibt.unam.mx

<sup>4</sup> Departamento de Ingeniería Agroindustrial, Universidad de Guanajuato, Salvatierra, Guanajuato, México; alejandroveloz@hotmail.com

<sup>5</sup> UMR152 PharmaDev, Université de Toulouse, IRD, UPS, France; maelle.carraz@ird.fr

\* Correspondence: [letymaya@uaem.mx](mailto:letymaya@uaem.mx); Tel.: +52 777 3297000, ext 2325

## List of Figures

**Figure S1.** Mass spectrum of gallic acid

**Figure S2.** NMR  $^1\text{H}$  spectrum of gallic acid [(400 MHz, ACETONE- $d_6$ ),  $\delta$  (ppm)].

**Figure S3.** NMR  $^{13}\text{C}$  spectrum of gallic acid [(100 MHz, ACETONE- $d_6$ ),  $\delta$  (ppm)].

**Figure S4.** Mass spectrum of ethyl gallate

**Figure S5.** NMR  $^1\text{H}$  spectrum of ethyl gallate [(400 MHz, ACETONE- $d_6$ ),  $\delta$  (ppm)].

**Figure S6.** NMR  $^{13}\text{C}$  spectrum of ethyl gallate [(100 MHz, ACETONE- $d_6$ ),  $\delta$  (ppm)].

**Figure S7.** Effect of *C. coriaria* extract and isolated compounds on cell cycle in PC3 cell line of prostate cancer.

**Figure S8.** Effect of *C. coriaria* extract and isolated compounds on cell cycle in Hep3B cell line of hepatocellular carcinoma

**Figure S9.** Effect of *C. coriaria* extract and isolated compounds on cell cycle in HepG2 cell line of hepatocellular carcinoma

**Figure S10.** Effect of *C. coriaria* extract and isolated compounds on cell cycle in HeLa cell line of cervical cancer.

**Figure S11.** Effect of *C. coriaria* extract and isolated compounds on cell cycle in Ca Ski cell line of cervical cancer.

**Figure S12.** Effect of isolated compounds on stabilization of microtubules by confocal microscopy in PC3 cells.

**Figure S13.** Effect of extract *C. coriaria* and isolated compounds on cell death by epifluorescence microscopy in PC3 cell line of prostate cancer.

**Figure S14.** Effect of extract *C. coriaria* and isolated compounds on cell death by epifluorescence microscopy in HepG2 cell line of hepatocellular carcinoma

**Figure S15.** Effect of extract *C. coriaria* and isolated compounds on cell death by epifluorescence microscopy in HeLa cell line of cervical cancer.

**Figure S16.** Effect of extract *C. coriaria* and isolated compounds on cell death by epifluorescence microscopy in CaS ki cell line of cervical cancer.

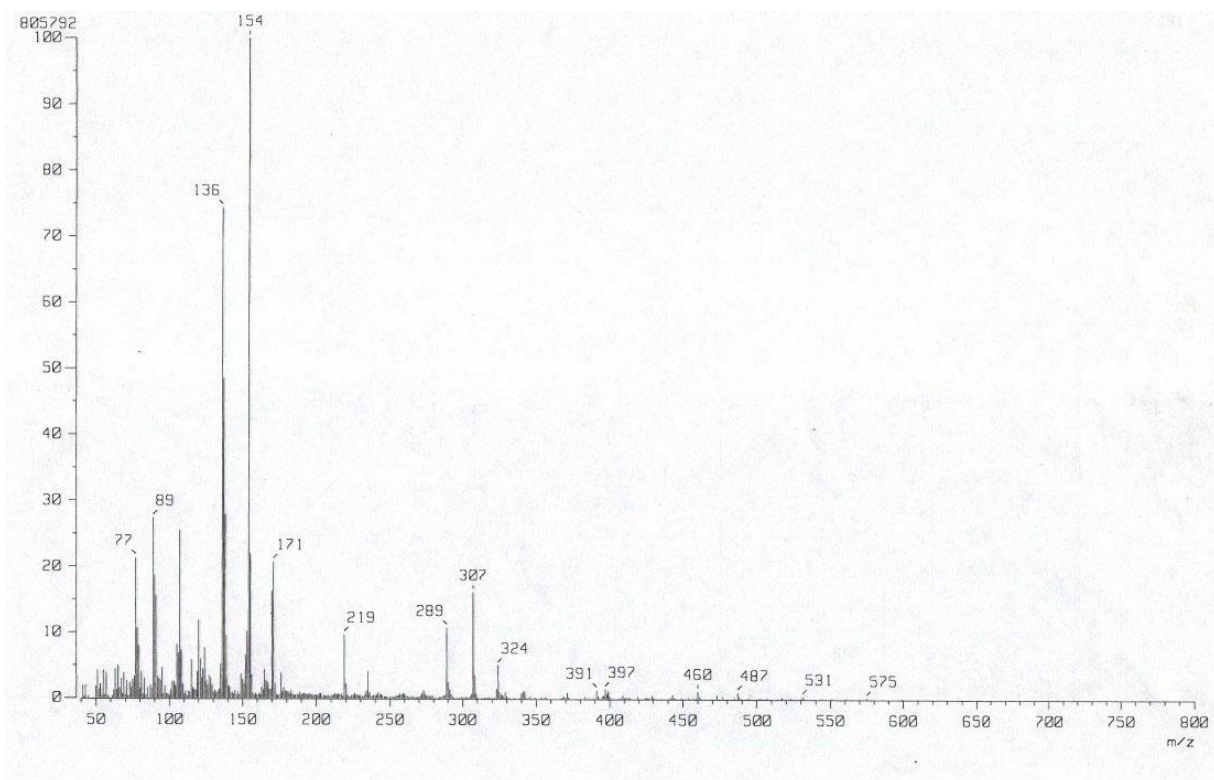

Figure S1. Mass spectrum of gallic acid

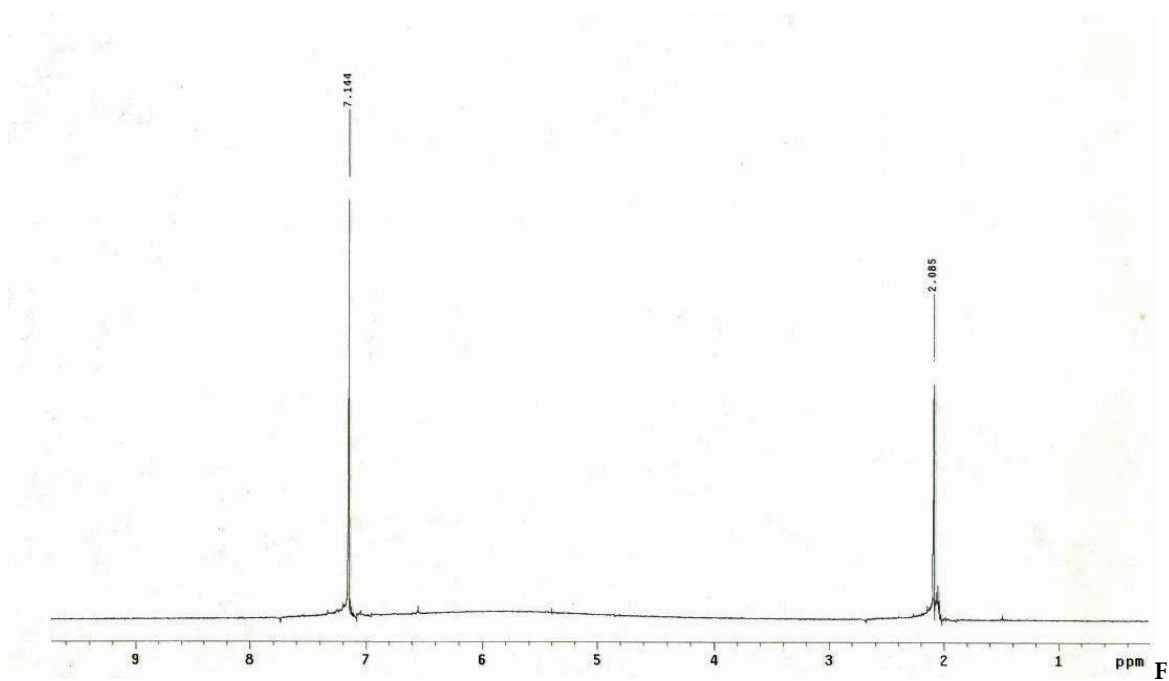

Figure S2. NMR  $^1\text{H}$  spectrum of gallic acid [(400 MHz, ACETONE- $d_6$ ),  $\delta$  (ppm)]

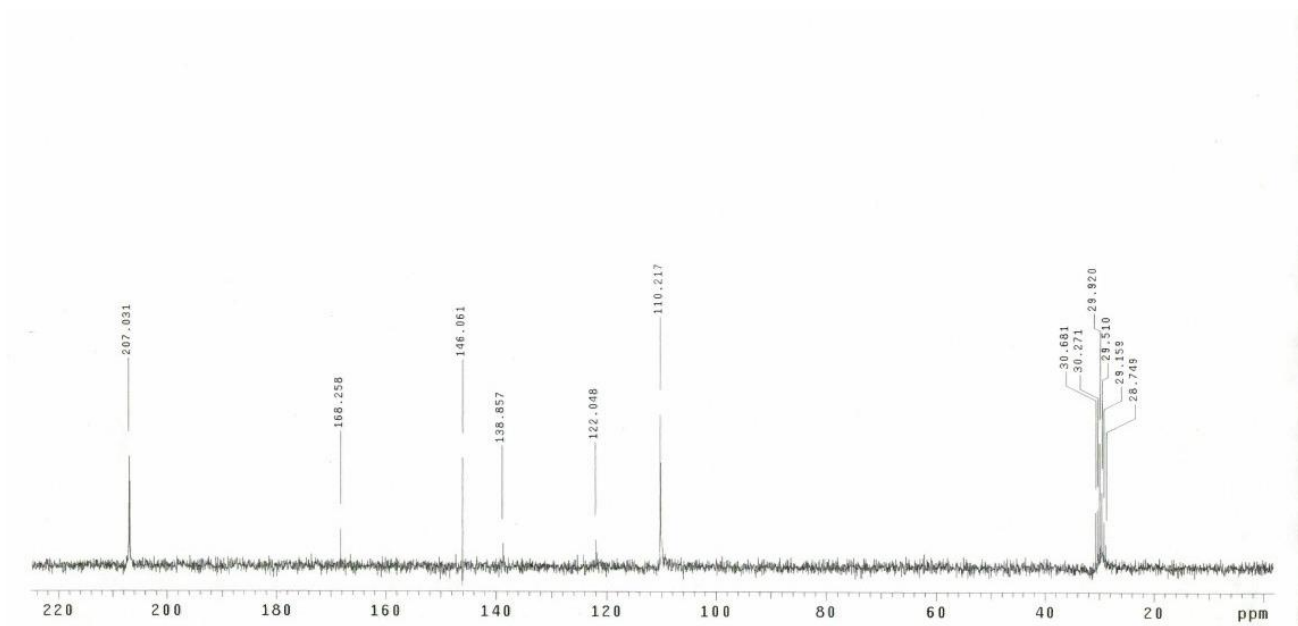

Figure S3. NMR  $^{13}\text{C}$  spectrum of gallic acid [(100 MHz, ACETONE- $d_6$ ),  $\delta$  (ppm)].

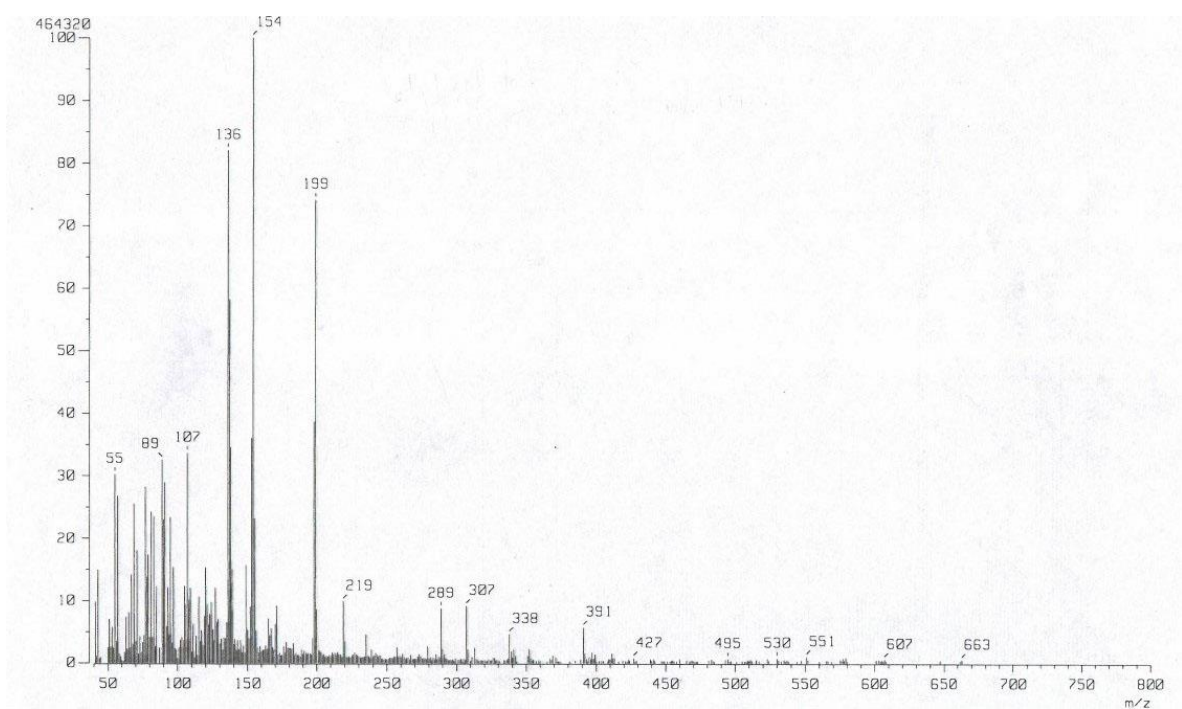

Figure S4. Mass spectrum of ethyl gallate

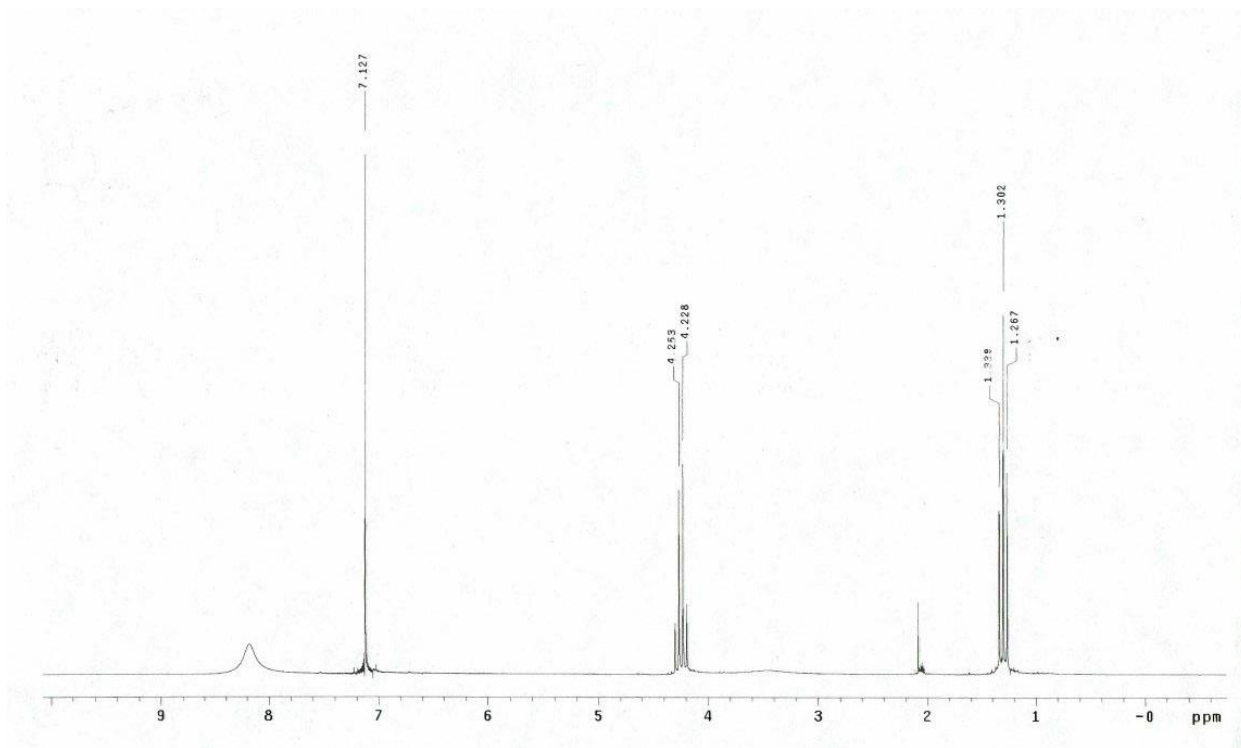

Figure S5. NMR  $^1\text{H}$  spectrum of ethyl gallate [(400 MHz, ACETONE- $d_6$ ),  $\delta$  (ppm)].

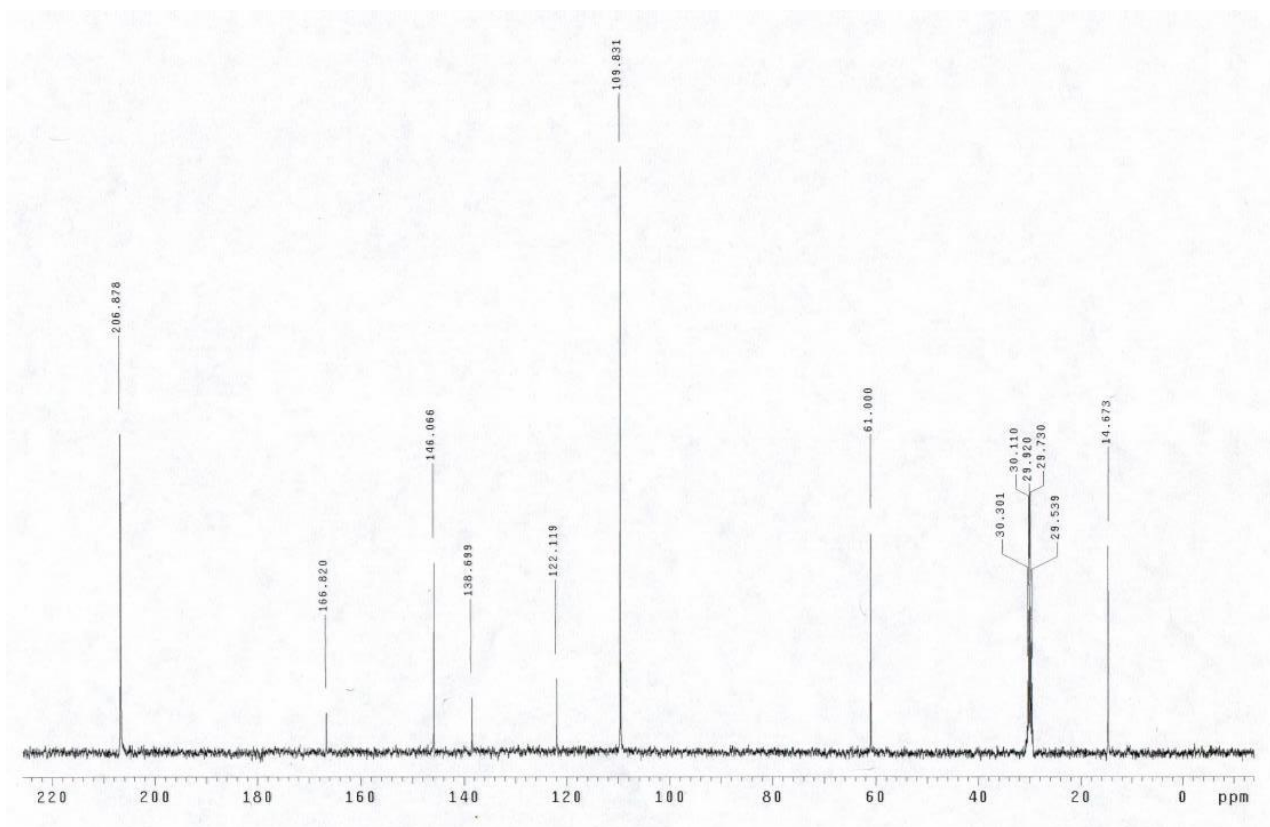

Figure S6. NMR  $^{13}\text{C}$  spectrum of ethyl gallate [(100 MHz, ACETONE- $d_6$ ),  $\delta$  (ppm)].

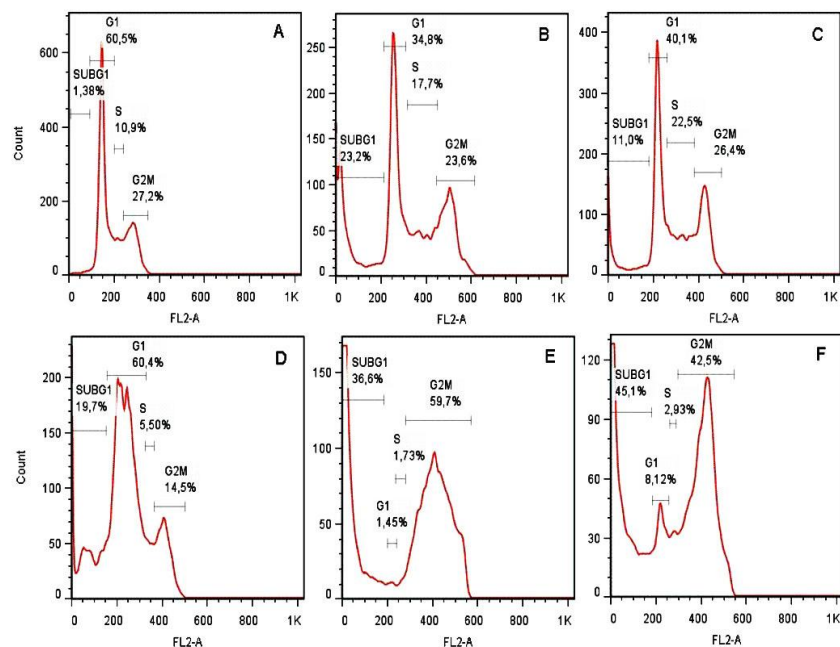

**Figure S7.** Effect of *C. coriaria* extract and isolated compounds on cell cycle in PC3 cell line of prostate cancer. (A) Negative control; (B) *C. coriaria* extract; (C) Gallic acid; (D) Ethyl gallate; (E) Tannic acid; (F) Podophyllotoxin 0.005 μM (positive control).

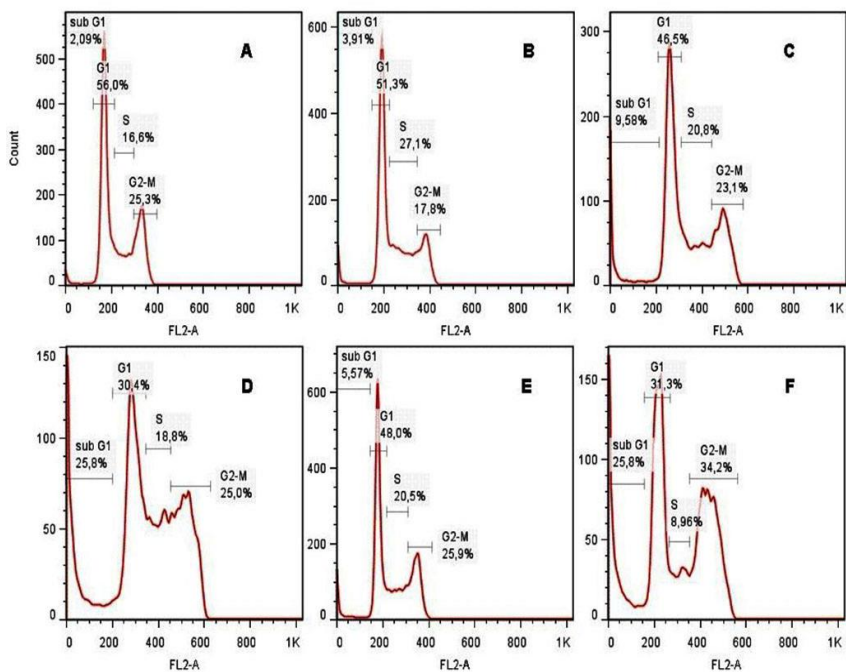

**Figure S8.** Effect of *C. coriaria* extract and isolated compounds on cell cycle in Hep3B cell line of hepatocellular carcinoma. (A) Negative control; (B) *C. coriaria* extract; (C) Gallic acid; (D) Ethyl gallate; (E) Tannic acid; (F) Podophyllotoxin 0.005 μM (positive control).

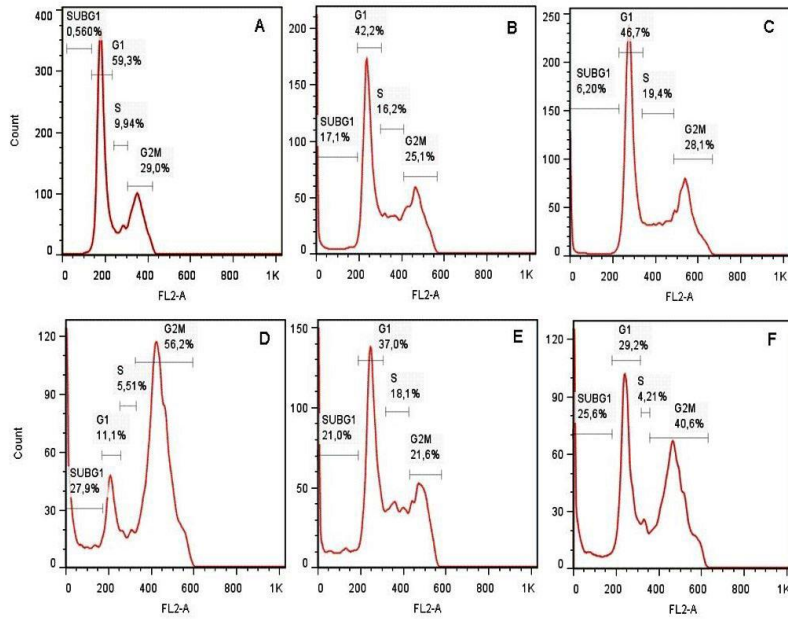

**Figure S9.** Effect of *C. coriaria* extract and isolated compounds on cell cycle in HepG2 cell line of hepatocellular carcinoma. (A) Negative control; (B) *C. coriaria* extract; (C) Gallic acid; (D) Ethyl gallate; (E) Tannic acid; (F) Podophyllotoxin 0.005µM (positive control).

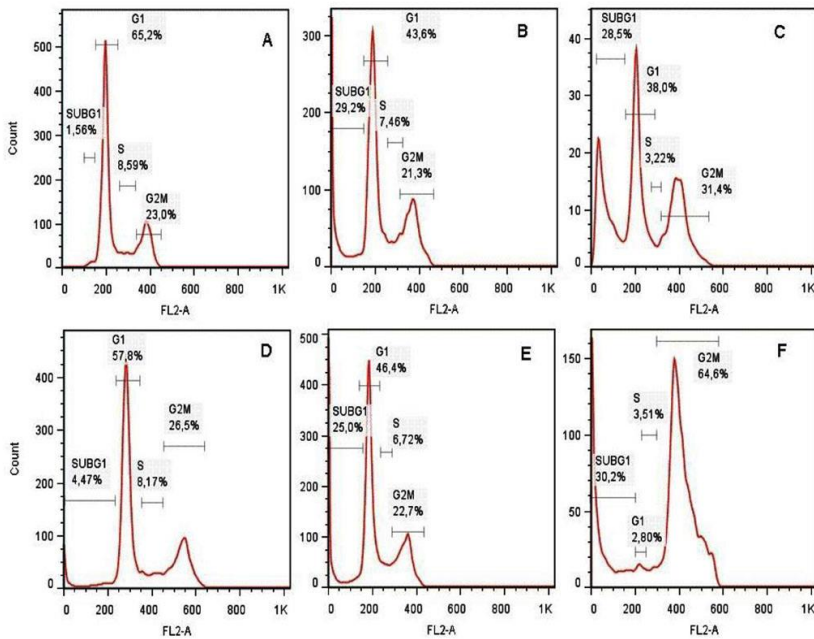

**Figure S10.** Effect of *C. coriaria* extract and isolated compounds on cell cycle in HeLa cell line of cervical cancer. (A) Negative control; (B) *C. coriaria* extract; (C) Gallic acid; (D) Ethyl gallate; (E) Tannic acid; (F) Podophyllotoxin 0.005µM (positive control).

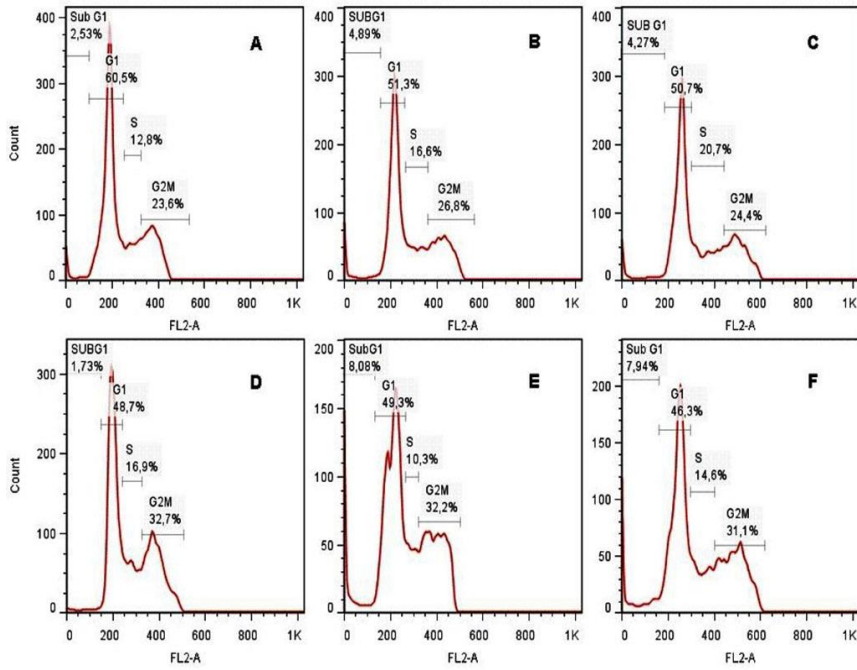

**Figure S11.** Effect of *C. coriaria* extract and isolated compounds on cell cycle in CaS ki cell line of cervical cancer. (A) Negative control; (B) *C. coriaria* extract; (C) Gallic acid; (D) Ethyl gallate; (E) Tannic acid; (F) Podophyllotoxin 0.005 $\mu$ M (positive control).



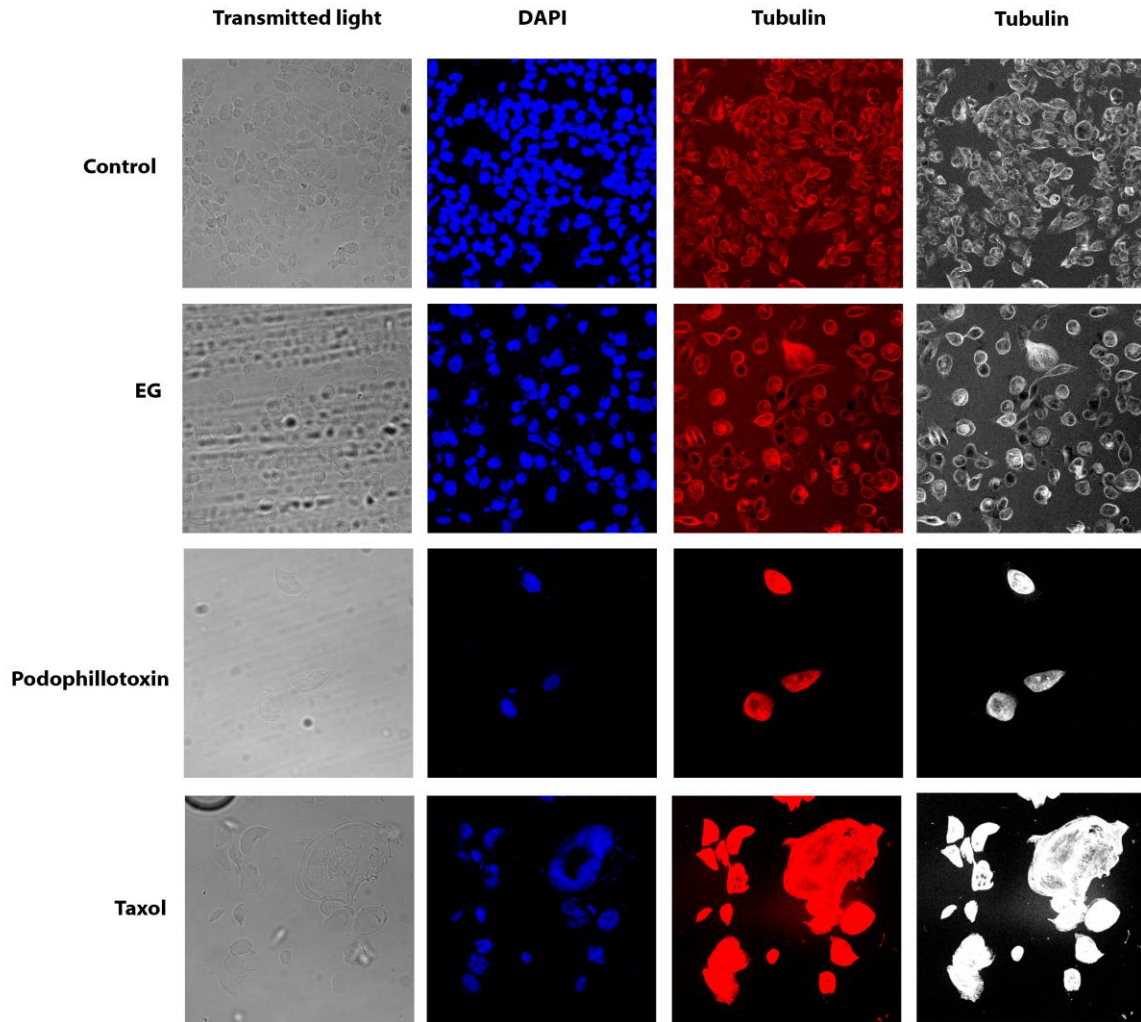

**Figure S12.** Effect of EG microtubules in PC3 cells by confocal microscopy. Podophillotoxin (Microtubules destabilizing agent) and Taxol (Microtubules stabilizing agent).

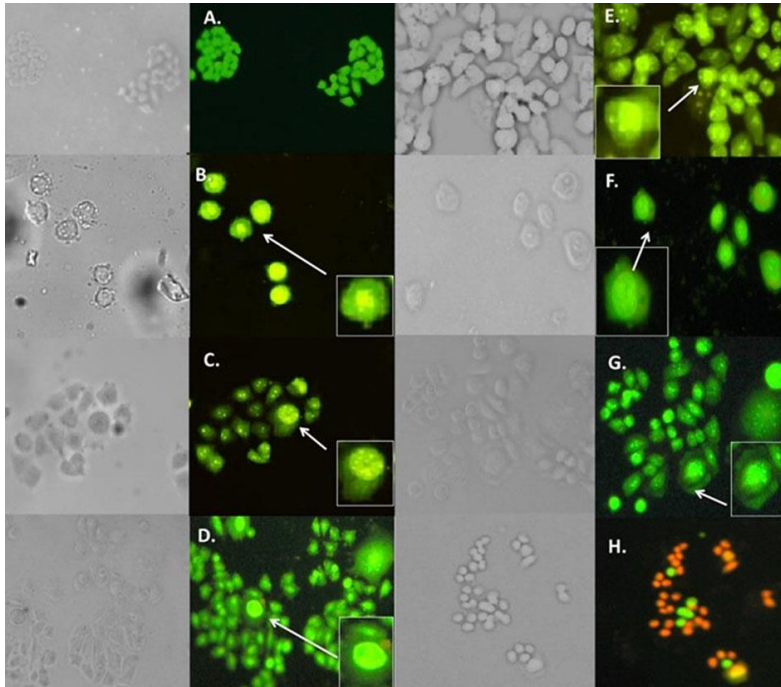

**Figure S13.** Effect of extract *C.coritaria* and isolated compounds on cell death by epifluorescence microscopy in PC3 cell line of prostate cancer. (A) Negative control; (B) *C. coriaria* extract; (C) Gallic acid; (D) Ethyl gallate; (E) Tannic acid; (F) Podophyllotoxin 0.005 $\mu$ M (positive control); (G) H<sub>2</sub>O<sub>2</sub> apoptosis positive control; (H) Necrosis control.

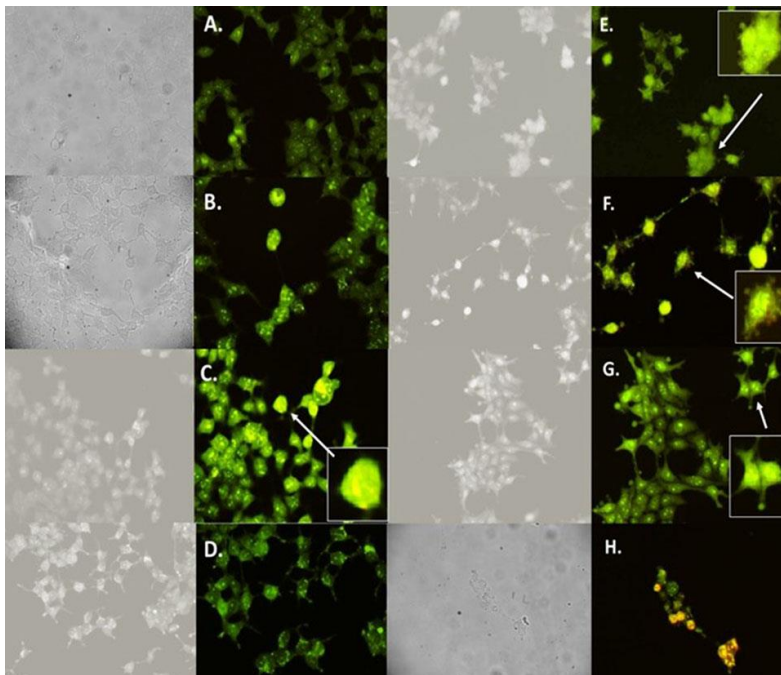

**Figure S14.** Effect of extract *C.coritaria* and isolated compounds on cell death by epifluorescence microscopy in HepG2 cell line of hepatocellular carcinoma. (A) Negative control; (B) *C. coriaria* extract; (C) Gallic acid; (D) Ethyl gallate; (E) Tannic acid; (F) Podophyllotoxin 0.005 $\mu$ M (positive control); (G) H<sub>2</sub>O<sub>2</sub> apoptosis positive control; (H) Necrosis control.

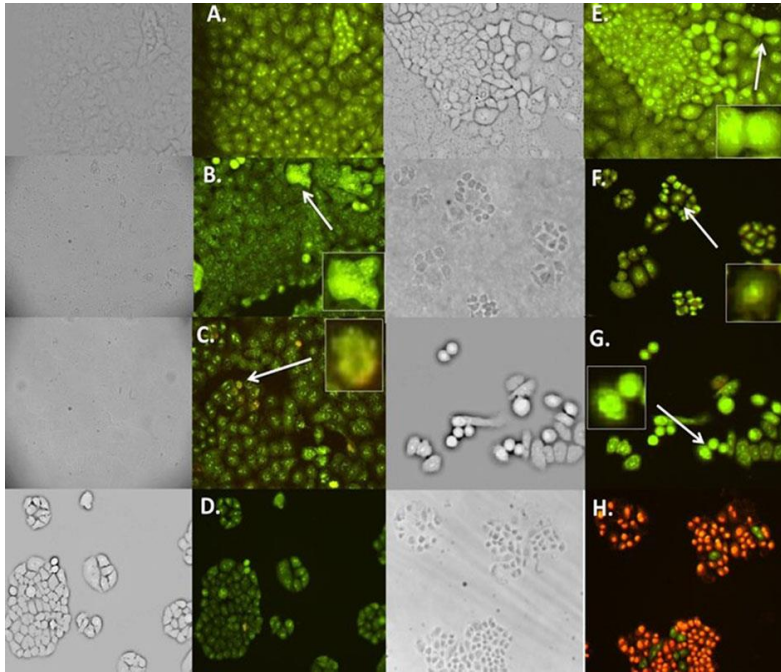

**Figure S15.** Effect of extract *C.coriaria* and isolated compounds on cell death by epifluorescence microscopy in HeLa cell line of cervical cancer. (A) Negative Control; (B) *C. coriaria* extract; (C) Gallic acid; (D) Ethyl gallate; (E) Tannic acid; (F) Podophyllotoxin 0.005 $\mu$ M (positive control); (G) H<sub>2</sub>O<sub>2</sub> apoptosis positive control; (H) Necrosis control.

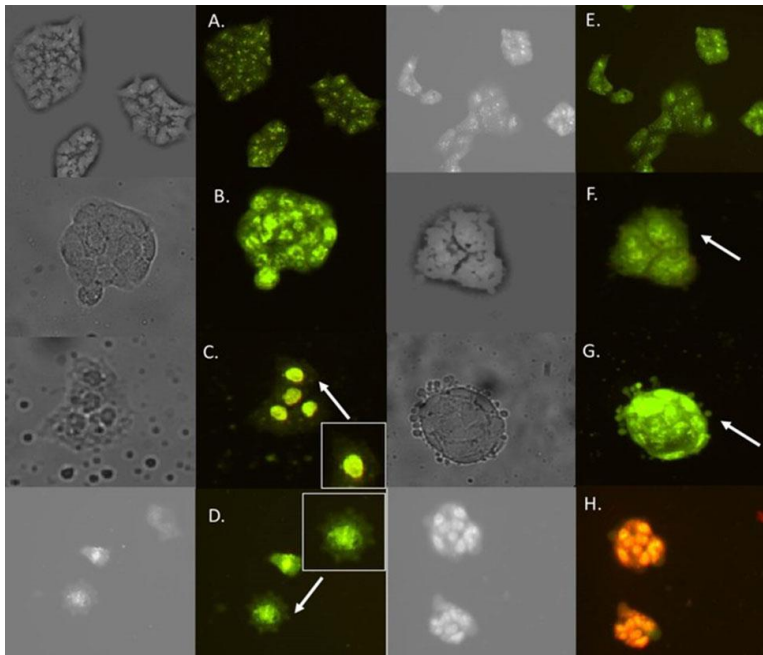

**Figure S16.** Effect of extract *C.coriaria* and isolated compounds on cell death by epifluorescence microscopy in CaS ki cell line of cervical cancer. (A) Negative Control; (B) *C. coriaria* extract; (C) Gallic acid; (D) Ethyl gallate; (E) Tannic acid; (F) Podophyllotoxin 0.005 $\mu$ M (positive control); (G) H<sub>2</sub>O<sub>2</sub> apoptosis positive control; (H) Necrosis control.
